# Supplementary material for: Designing strong inducible synthetic promoters in yeasts
Source: Research Square preprint supplement (doi:10.21203/rs.3.rs-4454036/v1), 2024-06-10
Supplement: Supplementary file 1 [file 1e0c704e9f394f31c2dc6c78.xlsx]

## Sheet: Cover
Supplementary Tables for “Designing strong inducible synthetic promoters in yeasts”
Tominaga et al.,

## Sheet: Table S1. Plasmids
Supplementary Table 1. Plasmids used in this study
Plasmid name	Coding protein	Promoter/iSynP	Related primers	Construction overview/Short description	Selection marker	Addgene ID	Reference
pGK415-phlTA	PhlTA	n/a	n/a	Yeast expression plasmid containing phlTA gene with upstream ScPGK1 promoter and downstream ScPGK1 terminator.	LEU2	n/a	M. Tominaga et al., Robust and flexible platform for directed evolution of yeast genetic switches. Nature Communications, 12, 1846 (2021)
pGK415-phlTA1-2E	PhlTA1-2E	n/a	n/a	Yeast expression plasmid containing mutant phlTA (1-2E) expression cassette derived from pGK415-phlTA.	LEU2	n/a	M. Tominaga et al., Robust and flexible platform for directed evolution of yeast genetic switches. Nature Communications, 12, 1846 (2021)
pGK415-rphlTA2-1E	rPhlTA2-1E	n/a	n/a	Yeast expression plasmid containing mutant rphlTA (2-1E) expression cassette derived from pGK415-phlTA.	LEU2	165970	M. Tominaga et al., Robust and flexible platform for directed evolution of yeast genetic switches. Nature Communications, 12, 1846 (2021)
pRS406red-pphlO1 -TBG	TBD25AG	pphlO1	n/a	Yeast expression plasmid containing trifusion gene consisting of hsvTK, sh ble, and ymUkG1 gene with upstream synthetic promoter pphlO1 and downstream ScCYC1 terminator.	URA3	n/a	M. Tominaga et al., Robust and flexible platform for directed evolution of yeast genetic switches. Nature Communications, 12, 1846 (2021)
pGK416m-pphlO6 -ymUkG1	ymUkG1	pphlO6	n/a	Yeast expression plasmid containing ymUkG1 gene consisting of with upstream synthetic promoter pphlO6 and downstream ScPGK1 terminator.	URA3	n/a	M. Tominaga et al., Robust and flexible platform for directed evolution of yeast genetic switches. Nature Communications, 12, 1846 (2021)
pGK416m-ptetO7 -ymUkG1	ymUkG1	ptetO7	n/a	Yeast expression plasmid containing ymUkG1 gene consisting of with upstream synthetic promoter ptetO7 and downstream ScPGK1 terminator.	URA3	n/a	M. Tominaga et al., Robust and flexible platform for directed evolution of yeast genetic switches. Nature Communications, 12, 1846 (2021)
pGK416m-pluxO5 -ymUkG1	ymUkG1	pluxO5	n/a	Yeast expression plasmid containing ymUkG1 gene consisting of with upstream synthetic promoter pluxO5 and downstream ScPGK1 terminator.	URA3	n/a	M. Tominaga et al., Robust and flexible platform for directed evolution of yeast genetic switches. Nature Communications, 12, 1846 (2021)
pGK416-ymUkG1	ymUkG1	ScPGK1	n/a	Yeast expression plasmid containing EGFP gene with upstream ScPGK1 promoter and downstream ScPGK1 terminator.	URA3	n/a	M. Kaishima et al., Expression of varied GFPs in Saccharomyces cerevisiae: codon optimization yields stronger than expected expression and fluorescence intensity. Scientific Reports 6, 35932 (2016)
pKN108	EGFP	KpPhl1.1	KN013, KN025, KN028	The single phlO was fused to the KpAOX1 core promoter (-1 to -197) with a 5-bp spacer; The resulting synthetic promoter KpPhl1.1 was cloned into pUC19-PpPgap-EGFP_Pp-PpTgap1 using BamHI/SpeI sites.	G418R	To be assined	This study
pYI277	EGFP	KpGAPDH	MTX01, MTX02	Gene encoding KpARG4 with the 238-bp upstream sequence, and hygR cassette were sequentially cloned into the plasmid pUC19-PpPgap-EGFP_Pp-PpTgap1 using HindIII/EcoRI sites.	HygR	To be assined	This study
pYI315	EGFP	KpGAPDH	n/a	Yeast expression plasmid containing EGFP gene with upstream KpGAPDH promoter and downstream KpICY2 terminator.	G418R	To be assined	Y. Ito et al., Exchange of endogenous and heterogeneous yeast terminators in Pichia pastoris to tune mRNA stability and gene expression. Nucleic Acids Research 48, 13000-13012 (2020).
pYI335	EGFP	KpGAPDH	n/a	Yeast expression plasmid containing EGFP gene with upstream KpGAPDH promoter and downstream ScICY2 terminator.	G418R	To be assined	Y. Ito et al., Exchange of endogenous and heterogeneous yeast terminators in Pichia pastoris to tune mRNA stability and gene expression. Nucleic Acids Research 48, 13000-13012 (2020).
pMT478	rPhlTA2-E1	KpGAPDH	MT964, MT965	The gene encoding rPhlTA2-1E was cloned into the plasmid pYI277 by replacing the EGFP gene.	HygR	To be assined	This study
pMT856	EGFP	KpPhl1.1	KN025, KN028, MT1254, MT1591	The single phlO was fused to the KpAOX1 core promoter (-1 to -197) with a 5-bp spacer; The resulting synthetic promoter KpPhl1.1 was cloned into pYI277 using BamHI/SpeI sites.	HygR	To be assined	This study
pMT899	rPhlTA2-E1	KpGAPDH	MT1223, MT1264	The gene encoding rPhlTA2-1E amplified from the plasmid pMT478 was cloned into plasmid pUC19-PpPgap-EGFP_Pp-PpTgap1 by replacing EGFP gene.	G418R	To be assined	This study
pMT916	TBD25AG	pphlO6	MT1515. MT1516, MT1525, MT1529	The M13 origin sequence was removed and the synthetic promoter pphlO6 was cloned into plasmid pRS406red-pphlO1-TBG by replacing pphlO1 using BamHI/BstAPI/StuI sites.	URA3	n/a	This study
pMT949	EGFP	KpPhl1.1	MT1562, MT1563	The gene encoding KpARG4 together with the 238-bp upstream sequence was inserted into pKN108 by using BamHI site.	G418R	To be assined	This study
pMT950	EGFP	KpPhl1.1	MT1562, MT1564	The truncated 962-bp fragment of KpARG4 gene (KpARG4962) was inserted into pKN108 by using BamHI site.	G418R	To be assined	This study
pMT951	EGFP	KpPhl1.1	MT1562, MT1565	The truncated 563-bp fragment of KpARG4 gene (KpARG4563) was inserted into pKN108 by using BamHI site.	G418R	To be assined	This study
pMT952	EGFP	KpPhl6.1	MT1251, MT1254	The 6× phlO repeat derived from pGK416m-pphlO6 -ymUkG1 was fused to AOX1 core promoter (-1 to -197) with a 26-bp spacer; the resulting synthetic promoter KpPhl6.0 was cloned into the plasmid pYI277 using BamHI/SpeI sites.	HygR	To be assined	This study
pMT957	PhlTAE41G	ScPGK1	n/a	Plasmid isolated from the directed evolution experiment described in Extended Data Fig. 6.	LEU2	To be assined	This study
pMT958	EGFP	KpPhl1.2	KN023, KN028, MT1254, MT1591	The single phlO was fused to the KpAOX1 core promoter (-1 to -187) with a 5-bp spacer; the resulting synthetic promoter KpPhl1.2 was cloned into pYI277 using BamHI/SpeI sites.	HygR	To be assined	This study
pMT959	EGFP	KpPhl1.3	KN024, KN028, MT1254, MT1591	The single phlO was fused to the KpAOX1 core promoter (-1 to -177) with a 5-bp spacer; the resulting synthetic promoter KpPhl1.3 was cloned into pYI277 using BamHI/SpeI sites.	HygR	To be assined	This study
pMT960	EGFP	KpPhl1.4	KN026, KN028, MT1254, MT1591	The single phlO was fused to the KpAOX1 core promoter (-1 to -207) with a 5-bp spacer; the resulting synthetic promoter KpPhl1.4 was cloned into pYI277 using BamHI/SpeI sites.	HygR	To be assined	This study
pMT961	EGFP	KpPhl1.5	KN027, KN028, MT1254, MT1591	The single phlO was fused to the KpAOX1 core promoter (-1 to -237) with a 5-bp spacer; the resulting synthetic promoter KpPhl1.5 was cloned into pYI277 using BamHI/SpeI sites.	HygR	To be assined	This study
pMT1014	EGFP	KpHsl5.0	MT1254, MT1551, MT1631, MT1632	The 5× luxO repeats derived from the plasmid pGK416m-pluxO5 -ymUkG1 was fused to the KpAOX1 core promoter (-1 to -197) with a 57-bp spacer; the resulting synthetic promoter KpHsl5.0 was cloned into the plasmid pYI277 using BamHI/SpeI sites.	HygR	To be assined	This study
pMT1026	PhlTAE41G	KpYPT1	MT1645, MT1647	The KpYPT1 promoter and gene encoding PhlTAE41G were sequentially cloned into pYI335 by replacing the KpGAPDH promoter and EGFP gene using, SpeI, XhoI, and BglII sites.	G418R	To be assined	This study
pMT1035	LuxTA2-4F	KpGAPDH	MT1223, MT1264	The gene encoding LuxTA2-4F was cloned into pUC19-PpPgap-EGFP_Pp-PpTgap1 by replacing EGFP gene using SpeI/XhoI sites.	G418R	To be assined	This study
pMT1219	RBDom	KpPhl6.1	MT1736, MT1757	The truncated fragment of ARG4 gene, and the gene encoding MFα (2×Adv)-RBDom-His were sequentially cloned into plasmid pYI2165 by replacing the ARG4 cassette and EGFP gene by using NheI, BglII, SpeI and MluI sites.	HygR	To be assined	This study
pMT1328	EGFP	KpPhl1.6	MT1254, MT1591, MT1932	The single phlO was fused to the KpAOX1 core promoter (-1 to -167) with a 5-bp spacer; the resulting synthetic promoter KpPhl1.6 was cloned into pYI277 using BamHI/SpeI sites.	HygR	To be assined	This study
pMT1341	EGFP	KpPhl1.7	MT1461, MT1949, MT1950	The single phlO was fused to the KpDAS1 core promoter (-1 to -262); the resulting synthetic promoter KpPhl1.7 was cloned into pYI277 using BamHI/SpeI sites.	HygR	To be assined	This study
pMT1342	EGFP	KpPhl1.8	MT1461, MT1949, MT1951	The single phlO was fused to the KpDAS1 core promoter (-1 to -232); the resulting synthetic promoter KpPhl1.8 was cloned into pYI277 using BamHI/SpeI sites.	HygR	To be assined	This study
pMT1343	EGFP	KpPhl1.9	MT1461, MT1949, MT1952	The single phlO was fused to the KpDAS1 core promoter (-1 to -202); the resulting synthetic promoter KpPhl1.9 was cloned into pYI277 using BamHI/SpeI sites.	HygR	To be assined	This study
pMT1344	EGFP	KpPhl1.10	MT1461, MT1949, MT1953	The single phlO was fused to the KpDAS1 core promoter (-1 to -172); the resulting synthetic promoter KpPhl1.10 was cloned into pYI277 using BamHI/SpeI sites.	HygR	To be assined	This study
pMT1345	EGFP	KpPhl1.11	MT1461, MT1949, MT1954	The single phlO was fused to the KpDAS1 core promoter (-1 to -142); the resulting synthetic promoter KpPhl1.11 was cloned into pYI277 using BamHI/SpeI sites.	HygR	To be assined	This study
pMT1346	EGFP	KpPhl1.12	MT1461, MT1949, MT1955	The single phlO was fused to the KpDAS1 core promoter (-1 to -132); the resulting synthetic promoter KpPhl1.12 was cloned into pYI277 using BamHI/SpeI sites.	HygR	To be assined	This study
pMT1347	EGFP	KpPhl1.13	MT1461, MT1949, MT1956	The single phlO was fused to the KpDAS1 core promoter (-1 to -122); the resulting synthetic promoter KpPhl1.13 was cloned into pYI277 using BamHI/SpeI sites.	HygR	To be assined	This study
pMT1348	EGFP	KpPhl1.14	MT1461, MT1949, MT1957	The single phlO was fused to the KpDAS1 core promoter (-1 to -112); the resulting synthetic promoter KpPhl1.14 was cloned into pYI277 using BamHI/SpeI sites.	HygR	To be assined	This study
pMT1349	EGFP	KpPhl1.15	MT1461, MT1949, MT1958	the single phlO was fused to the KpDAS1 core promoter (-1 to -107); The resulting synthetic promoter KpPhl1.15 was cloned into pYI277 using BamHI/SpeI sites.	HygR	To be assined	This study
pMT1350	EGFP	KpPhl2.1	MT1254, MT1831, MT1933, MT1934, MT1959, MT1960	The 2× phlO repeats amplified from pMT952 was fused to KpAOX1 core promoter (-1 to -167) with a 6-bp spacer; the resulting synthetic promoter KpPhl2.1 was cloned into the plasmid pYI277 using BamHI/SpeI sites.	HygR	To be assined	This study
pMT1351	EGFP	KpPhl6.1	MT1254, MT1831, MT1933, MT1934, MT1959, MT1960	The 6× phlO repeats derived from pGK416m-pphlO6 -ymUkG1 was fused to the KpAOX1 core promoter (-1 to -167) with a 6-bp spacer; the resulting synthetic promoter KpPhl6.1 was cloned into the plasmid pYI277 using BamHI/SpeI sites.	HygR	To be assined	This study
pMT1375	rTetTAK8N	KpGAPDH	MT960, MT961	The gene encoding rTetTAK8N, was cloned into pYI315 by replacing the EGFP gene using SpeI/XhoI sites.	G418R	To be assined	This study
pMT1419	EGFP	KpTc7.1	MT1834, MT1254, MT1934, MT1944, MT2005, MT2006	The 7× tetO2 repeats derived from pGK416m-ptetO7 -ymUkG1 was fused to the KpAOX1 core promoter (-1 to -162) with a 31-bp spacer; the resulting synthetic promoter KpTc7.1 was cloned into the plasmid pYI277 using BamHI/SpeI sites.	HygR	To be assined	This study
pMT1420	EGFP	KpHsl5.1	MT1834, MT1254, MT1934, MT1941, MT2010, MT2011	The 5× luxO repeats derived from pGK416m-pluxO5 -ymUkG1 was fused to the KpAOX1 core promoter (-1 to -166) with a 14-bp spacer; the resulting synthetic promoter KpHsl5.1 was cloned into the plasmid pYI277 using BamHI/SpeI sites.	HygR	To be assined	This study
pMT1434	EGFP	KpPhl1.1	MT2029, MT2030	The 493-bp DNA fragment of TKpGAPDH was inserted into pKN108 by using BamHI site.	G418R	To be assined	This study
pMT1449	EGFP	KpPhl1.16	MT1461, MT1834, MT2049, MT2050	The single phlO was fused to the KpDAS1 core promoter (-1 to -188[Δ-163 to -173]); the resulting synthetic promoter KpPhl1.16 was cloned into pYI277 using BamHI/SpeI sites.	HygR	To be assined	This study
pMT1461	MFα (2×Adv)-ALX-0081-3A-FLAG-His	KpTc7.1	MT1810, MT2070	The synTULA, ZeoR cassette, KpARG4 gene with 238-bp upstream sequence, the synthetic promoter KpTc7.1, gene encoding MFα (2×Adv)-ALX-0081-3A-FLAG-His, KpAOX1 terminator were cloned into pUC19 vector.	ZeoR	To be assined	This study
pMT1473	EGFP	KpPhl1.17	MT2032, MT2081	The single phlO was fused to the KpAOX1 core promoter (-1 to -107) with a 5-bp spacer; the resulting synthetic promoter KpPhl1.17 was cloned into pYI277 using BamHI/SpeI sites.	HygR	To be assined	This study
pMT1474	EGFP	KpPhl1.18	MT2032, MT2082	The single phlO was fused to the KpAOX1 core promoter (-1 to -83) with a 5-bp spacer; the resulting synthetic promoter KpPhl1.18 was cloned into pYI277 using BamHI/SpeI sites.	HygR	To be assined	This study
pMT1475	EGFP	KpPhl1.19	MT2032, MT2082	The single phlO was fused to the KpAOX1 core promoter (-1 to -53) with a 5-bp spacer; the resulting synthetic promoter KpPhl1.19 was cloned into pYI277 using BamHI/SpeI sites.	HygR	To be assined	This study
pMT1481	EGFP	KpPhl1.20	MT2032, MT2088	The single phlO was fused to the KpDAS1 core promoter (-31 to -107); the resulting synthetic promoter KpPhl1.20 was cloned into pYI277 using BamHI/SpeI sites.	HygR	To be assined	This study
pMT1482	EGFP	KpPhl1.21	MT2032, MT2089	The single phlO was fused to the KpDAS1 core promoter (-51 to -107); the resulting synthetic promoter KpPhl1.21 was cloned into pYI277 using BamHI/SpeI sites.	HygR	To be assined	This study
pMT1483	EGFP	KpPhl1.22	MT2032, MT2090	The single phlO was fused to the KpDAS1 core promoter (-61 to -107); the resulting synthetic promoter KpPhl1.22 was cloned into pYI277 using BamHI/SpeI sites.	HygR	To be assined	This study
pMT1487	EGFP	KpPhl1.23	MT2032, MT2091	The single phlO was fused to the KpAOX1 core promoter (-76 to -197) with a 5-bp spacer; the resulting synthetic promoter KpPhl1.23 was cloned into pYI277 using BamHI/SpeI sites.	HygR	To be assined	This study
pMT1521	EGFP	KpPh1.1	MT1423, MT2027, MT2165, MT2166	The 30-bp sequence upstream of the synthetic promoter KpPh1.1 of the plasmid pKN108 was randomized via In Fusion® cloning using AatII/XhoI sites.	G418R	To be assined	This study
pMT1550	EGFP	KpPhl1.1 TATA-box-library	MT2193, MT2194	The TATA-box of the synthetic promoter KpPhl1.1 was randomized and cloned into the plasmid pUC19-PpPgap-EGFP_Pp-PpTgap1 using BamHI/SpeI sites.	G418R	To be assined	This study
pMT1804	ymUkG1	ScPhl1.1	MT1432, MT2581	The single phlO was fused to the ScGAL1 core promoter (-1 to -150); the resulting synthetic promoter ScPhl1.1 was cloned into the plasmid pGK416-ymUkG1 using NheI/NsiI sites.	URA3	n/a	This study
pMT1812	ymUkG1	ScPhl1.4	MT2581, MT2598	The single phlO was fused to the ScGAL1 core promoter (-83 to -150); the resulting synthetic promoter ScPhl1.4 was cloned into the plasmid pGK416-ymUkG1 using NheI/NsiI sites.	URA3	n/a	This study
pMT1813	ymUkG1	ScPhl1.3	MT2581, MT2599	The single phlO was fused to the ScGAL1 core promoter (-60 to -150); the resulting synthetic promoter ScPhl1.3 was cloned into the plasmid pGK416-ymUkG1 using NheI/NsiI sites.	URA3	n/a	This study
pMT1814	ymUkG1	ScPhl1.2	MT2581, MT2600	The single phlO was fused to the ScGAL1 core promoter (-32 to -150); the resulting synthetic promoter ScPhl1.2 was cloned into the plasmid pGK416-ymUkG1 using NheI/NsiI sites.	URA3	n/a	This study
pMT1856	EGFP	KpHsl5.2	MT1254, MT2649	The 3× luxOVF1725 repeats was fused to the KpAOX1 core promoter (-1 to -166); the resulting synthetic promoter KpHsl5.2 was cloned into the plasmid pMT1014 using BamHI/SpeI sites.	HygR	To be assined	This study
pMT1857	EGFP	KpHsl5.3	MT1254, MT2650	The 3× luxOVF1161 repeats was fused to the KpAOX1 core promoter (-1 to -166); the resulting synthetic promoter KpHsl5.3 was cloned into the plasmid pMT1014 using BamHI/SpeI sites.	HygR	To be assined	This study
pMT1858	EGFP	KpHsl5.4	MT1254, MT2651	The 3× luxOVF1058 repeats was fused to the KpAOX1 core promoter (-1 to -166); the resulting synthetic promoter KpHsl5.4 was cloned into the plasmid pMT1014 using BamHI/SpeI sites.	HygR	To be assined	This study
pMT1876	EGFP	KpHsl10.2	MT1474, MT1475	The 5× luxO repeats derived from the plasmid pGK416m-pluxO5 -ymUkG1 was cloned into the plasmid pMT1857 using AflII site.	HygR	To be assined	This study
pMT1877	EGFP	KpHsl15.1	MT1474, MT1475	The 5× luxO repeats derived from the plasmid pGK416m-pluxO5 -ymUkG1 was cloned into the plasmid pMT1876 using AflII site.	HygR	To be assined	This study
pMT1883	EGFP	KpHsl10.1	MT1474, MT1475	The 5× luxO repeats derived from the plasmid pGK416m-pluxO5 -ymUkG1 was cloned into the plasmid pMT1420 using AflII site.	HygR	To be assined	This study
pMT1980	EGFP	KpPhl12.1	MT1328, MT2032	The 6× phlO repeats amplified from the plasmid pMT952 was cloned into the plasmid pMT1351 using BamHI site.	HygR	To be assined	This study
pMT1981	EGFP	KpPhl18.1	MT1328, MT2032	The 6× phlO repeats amplified from the plasmid pMT952 was cloned into the plasmid pMT1980 using BamHI site.	HygR	To be assined	This study
pMT2013	EGFP	KpTc14.1	MT2895, MT2896	The 7× tetO2 repeats amplified from the plasmid pMT1419 was cloned into the plasmid pMT1419 using ApaI site.	HygR	To be assined	This study
pMT2076	EGFP	KpPh1.1	MT3067, MT3068	The 428-bp DNA fragment of synTKpULA1 was inserted into pKN108 by using BamHI site.	HygR	To be assined	This study
pMT2077	EGFP	KpPh1.1	MT3069, MT3068	The 788-bp DNA fragment of synTKpULA1 was inserted into pKN108 by using BamHI site.	HygR	To be assined	This study
pMT2080	EGFP	KpTc3.1	MT2006, MT2895	The 3× tetO2 repeats derived from the plasmid pGK416m-ptetO7 -ymUkG1 was fused to the KpAOX1 core promoter (-1 to -162); the resulting synthetic promoter KpTc3.1 was cloned into the plasmid pYI277 using BamHI/SpeI sites.	HygR	To be assined	This study
pMT2081	EGFP	KpTc5.1	MT1495, MT1423	The 5× tetO2 repeats derived from the plasmid pGK416m-ptetO7 -ymUkG1 was fused to the KpAOX1 core promoter (-1 to -162); the resulting synthetic promoter KpTc3.1 was cloned into the plasmid pYI277 using BamHI/SpeI sites.	HygR	To be assined	This study
pMT2086	EGFP	KpTc1.1	MT2006, MT2895	The single tetO2 was fused to the KpAOX1 core promoter (-1 to -162); the resulting synthetic promoter KpTc1.1 was cloned into the plasmid pYI277 using BamHI/SpeI sites.	HygR	To be assined	This study
pMT2092	EGFP	KpPhl1.1	MT3068, MT3109	The 218-bp DNA fragment of synTKpULA1 was inserted into pKN108 by using BamHI site.	G418R	To be assined	This study
pMT2093	EGFP	KpPhl1.1	MT3069, MT3110	The 218-bp DNA fragment of synTKpULA1 was inserted into pKN108 by using BamHI site.	G418R	To be assined	This study
pMT2094	EGFP	KpPhl1.1	MT3067, MT3110	The 578-bp DNA fragment of synTKpULA1 was inserted into pKN108 by using BamHI site.	G418R	To be assined	This study
pMT2095	EGFP	KpPhl1.1	MT2029, MT3111	The 254-bp DNA fragment of TKpGAPDH was inserted into pKN108 by using BamHI site.	G418R	To be assined	This study
pMT2096	EGFP	KpPhl1.1	MT1562, MT3112	The truncated 256-bp fragment of KpARG4 gene was inserted into pKN108 by using BamHI site.	G418R	To be assined	This study
pYI2165	MFα (2×Adv)-ALX-0171-3A-FLAG-His	KpPhl6.0	n/a	The gene encoding MFα (2×Adv)-ALX-0171-3A-FLAG-His was cloned into the plasmid pMT952 by replacing EGFP gene.	HygR	To be assined	This study
pYI2206	rPhlTA2-1E	n/a	MTX03, MTX04, MTX05, MTX06, MTX07, MTX08	The expression cassette for rPhlTA2-1E, BsdR gene, and synT36177 was cloned into pUC19 vector.	BsdR	To be assined	This study
pYI2216	MFα (2×Adv)-ALX-0081-3A-FLAG-His	KpPhl6.0	n/a	The gene encoding MFα (2×Adv)-ALX-0081-3A-FLAG-His was cloned into the plasmid pMT952 by replacing EGFP gene.	HygR	To be assined	This study
pYI2292	MFα (2×Adv)-ALX-0171-3A-FLAG-His	KpAOX1	n/a	The KpPhl6.0 promoter in plasmid pY2165 was replaced with an KpAOX1 promoter of which the BglII site was mutated.	HygR	To be assined	This study
pYI2293	MFα (2×Adv)-ALX-0081-3A-FLAG-His	KpGAPDH	n/a	The KpPhl6.0 promoter in plasmid pYI2216 was replaced with an KpGAPDH promoter.	HygR	To be assined	This study
pYI2294	MFα (2×Adv)-ALX-0081-3A-FLAG-His	KpAOX1	n/a	The KpPhl6.0 promoter in plasmid pYI2216 was replaced with an KpAOX1 promoter.	HygR	To be assined	This study
pUC19-MCS-Zeo	n/a	n/a	n/a	n/a	ZeoR	n/a	Y. Ito et al., Exchange of endogenous and heterogeneous yeast terminators in Pichia pastoris to tune mRNA stability and gene expression. Nucleic Acids Research 48, 13000-13012 (2020).
pUC19-PpPgap-EGFP_Pp-PpTgap1	EGFP	n/a	n/a	n/a	G418R	n/a	Y. Nakamura et al., A stable, autonomously replicating plasmid vector containing Pichia pastoris centromeric DNA. Applied and Environmental Microbiology 84, e02882-17 (2018).
n/a, not applicable

## Sheet: Table S2. K. phaffii strains
Supplementary Table 2. Komagataella phaffii strains used in each Figure
Strain	Parental strain	Integrated plasmid	Selectable marker	Source
CBS 7435	n/a	n/a	n/a	ATCC (NRRL-Y11430)
PpMT030	CBS 7435	pMT478	HygR	This study
PpMT068	PpMT030	pKN108	G418R, HygR	This study
PpMT132	CBS 7435	pMT856	HygR	This study
PpMT136	PpMT132	pMT899	G418R, HygR	This study
PpMT144	PpMT146	pMT949	G418R, HygR	This study
PpMT145	PpMT146	pMT950	G418R, HygR	This study
PpMT146	CBS 7435	pMT899	G418R	This study
PpMT149	PpMT146	pMT951	G418R, HygR	This study
PpMT153	PpMT146	pMT958	G418R, HygR	This study
PpMT155	PpMT146	pMT960	G418R, HygR	This study
PpMT157	PpMT146	pMT961	G418R, HygR	This study
PpMT170	PpMT146	pMT959	G418R, HygR	This study
PpMT203	CBS 7435	pMT1026	G418R	This study
PpMT228	PpMT203	pMT952	G418R, HygR	This study
PpMT249	PpMT146	pMT1328	G418R, HygR	This study
PpMT254	PpMT146	pMT1350	G418R, HygR	This study
PpMT255	PpMT146	pMT1351	G418R, HygR	This study
PpMT257	PpMT203	pMT1351	G418R, HygR	This study
PpMT258	PpMT146	pMT1341	G418R, HygR	This study
PpMT259	PpMT146	pMT1342	G418R, HygR	This study
PpMT260	PpMT146	pMT1343	G418R, HygR	This study
PpMT261	PpMT146	pMT1344	G418R, HygR	This study
PpMT262	PpMT146	pMT1345	G418R, HygR	This study
PpMT263	PpMT146	pMT1346	G418R, HygR	This study
PpMT264	PpMT146	pMT1347	G418R, HygR	This study
PpMT265	PpMT146	pMT1348	G418R, HygR	This study
PpMT266	PpMT146	pMT1349	G418R, HygR	This study
PpMT272	PpMT146	pMT1219	G418R, HygR	This study
PpMT278	CBS 7435	pMT1375	G418R	This study
PpMT281	PpYI1732	pMT1375	BsdR, G418R	This study
PpMT308	PpMT030	pMT1434	G418R, HygR	This study
PpMT315	PpMT146	pMT1449	G418R, HygR	This study
PpMT319	PpMT278	pMT1419	G418R, HygR	This study
PpMT327	PpMT146	pMT1473	G418R, HygR	This study
PpMT328	PpMT146	pMT1474	G418R, HygR	This study
PpMT329	PpMT146	pMT1475	G418R, HygR	This study
PpMT339	PpMT281	pMT1461	BsdR, G418R, ZeoR	This study
PpMT340	CBS 7435	pMT1035	G418R	This study
PpMT341	PpMT339	pYI2165	BsdR, G418R, HygR, ZeoR	This study
PpMT347	PpMT146	pMT1481	G418R, HygR	This study
PpMT348	PpMT146	pMT1482	G418R, HygR	This study
PpMT349	PpMT146	pMT1483	G418R, HygR	This study
PpMT350	PpMT146	pMT1487	G418R, HygR	This study
PpMT352	PpMT030	pMT1521	G418R, HygR	This study
PpMT353	PpMT030	pMT1550	G418R, HygR	This study
PpMT383	CBS 7435	pMT1420	G418R	This study
PpMT394	PpMT340	pMT1420	G418R, HygR	This study
PpMT508	PpMT340	pMT1856	G418R, HygR	This study
PpMT509	PpMT340	pMT1857	G418R, HygR	This study
PpMT510	PpMT340	pMT1858	G418R, HygR	This study
PpMT512	PpMT340	pMT1876	G418R, HygR	This study
PpMT518	PpMT340	pMT1877	G418R, HygR	This study
PpMT520	PpMT340	pMT1883	G418R, HygR	This study
PpMT619	PpMT146	pMT1980	G418R, HygR	This study
PpMT649	PpMT146	pMT1981	G418R, HygR	This study
PpMT653	PpMT278	pMT2013	G418R, HygR	This study
PpMT749	PpMT030	pMT2076	G418R, HygR	This study
PpMT751	PpMT030	pMT2077	G418R, HygR	This study
PpMT753	PpMT278	pMT2086	G418R, HygR	This study
PpMT755	PpMT278	pMT2080	G418R, HygR	This study
PpMT757	PpMT278	pMT2081	G418R, HygR	This study
PpMT759	PpMT278	pMT1419	G418R, HygR	This study
PpMT768	PpMT030	pMT2092	G418R, HygR	This study
PpMT770	PpMT030	pMT2093	G418R, HygR	This study
PpMT772	PpMT030	pMT2094	G418R, HygR	This study
PpMT774	PpMT030	pMT2095	G418R, HygR	This study
PpMT776	PpMT030	pMT2096	G418R, HygR	This study
PpYI102	CBS 7435	pYI277	HygR	This study
PpYI1732	CBS 7435	pYI2206	BsdR	This study
PpYI1739	PpMT146	pYI2165	G418R, HygR	This study
PpYI1740	PpMT146	pYI2216	G418R, HygR	This study
PpYI1746	PpMT203	pYI2216	G418R, HygR	This study
PpYI1860	CBS 7435	pYI2292	HygR	This study
PpYI1861	CBS 7435	pYI2293	HygR	This study
PpYI1862	CBS 7435	pYI2294	HygR	This study
n/a, not applicable

## Sheet: Table S3. S. cerevisiae strains
Supplementary Table 3. Saccharomyces cerevisiae strains used this study
Strain	Parental strain	Integrated plasmid	Selectable Marker	Source
BY4741-Phl2-1E-Lux2-4F	n/a	n/a	HIS3, LEU2	M. Tominaga et al., Nature Communications, 12, 1846 (2021) DOI: 10.1038/s41467-021-22134-y
ScMT702	BY4741-Phl2-1E-Lux2-4F	pMT1821	HIS3, LEU2, KanMX	This study
BY4741-hENT1	BY4741	pMT144	HIS3	M. Tominaga et al., Nature Communications, 12, 1846 (2021) DOI: 10.1038/s41467-021-22134-y
ScMT487	BY4741-hENT1	pMT916	HIS3, URA3	This study
n/a, not applicable

## Sheet: Table S4. Primers
Supplementary Table 4. Primers used in this study
#	Name	Sequence
KN013	EGFP-AOX1p-R	tagaaaccatactagtcgtttcgaataattagttgttttttgatcttctc
KN023	phlO=AOX1p(core-0)-F	TATGTatgatacgaaacgtaccgtatcgtTAAGGTAGCGTCTGTTCTAACCCCTACTTGACAG
KN024	phlO=AOX1p(core-10)-F	TATGTatgatacgaaacgtaccgtatcgtTAAGGTAGCGTCCCTACTTGACAGCAATATATAAACAG
KN025	phlO=AOX1p(core+10)-F	TATGTatgatacgaaacgtaccgtatcgtTAAGGTAGCGTCAAAATTTAACTGTTCTAACCCCTACTTG
KN026	phlO=AOX1p(core+20)-F	TATGTatgatacgaaacgtaccgtatcgtTAAGGTAGCGTCGTTCATGATCAAAATTTAACTGTTCTAACC
KN027	phlO=AOX1p(core+50)-F	TATGTatgatacgaaacgtaccgtatcgtTAAGGTAGCGTATTCTGGTGGGAATACTGCTG
KN028	InF-BamH1-phlO-F	ttgcggccgcggatcctatgtatgatacgaaacgtaccgtatc
MT1223	AOX1-inf-XhoI-R	CAGTCATGTCTAAGGCTCGagg
MT1251	BamHI	AAGCTTGCGGCCGCGGATC
MT1254	pAOX1-EGFP-R	acccttagaaaccatACTAGTCG
MT1264	GAPDH-SpeI-F	ACTATCAAAACACAactagtgcgtc
MT1328	pKpIK-50-R	ATCATACATAGGATCCttgttatccgctcacaattccac
MT1423	KpEGFP-R (tAOX1)	CAGTCATGTCTAAGGCTCG
MT1432	pgal1-NheI-R	CCATGTCGACGCTAGCtatagttttttctccttgacgttaaagtatagag
MT1461	pDAS1-EGFP-rev	acccttagaaaccatactagtTTTGTTCGATTATTCTCCAGATAAAATCAACAATAG
MT1474	luxO5 multi-R	ttcgaccttgcgtaACTTAAcattatcatccggatcacataCG
MT1475	luxO5 multi-F	GCgTGTTTTTTATTCCTTAAGTtacgc
MT1495	tetO-random-F	cgggccccccctcgagtttactccctatcagtg
MT1515	URA3-StuI-F	gtaacaaaggaacctagaggc
MT1516	URA3-phlO-R	TACGTTTCGTATCATggatccTCGGACTCCGATGGGAAC
MT1525	phlO6-F2	CCATCGGAGTCCGAGGATCCcgctattacgccagcggatccATG
MT1529	GAL1-BSTAPI	TAGTTAAAGTGGTTATGCAGtttttgc
MT1551	NsiI-pAOX1-F	TGATCCGGGTAATAATGCATCAAAATTTAACTGTTCTAACCCCtac
MT1562	ARG4-phlO1-R	aTCATACATAggatccTCTAGAgtcg
MT1563	ARG4-1.6kb-F	TTGCGGCCGCGGATCcatggttgtgcgacagattcac
MT1564	ARG4-1kb-F	TTGCGGCCGCGGATCtcatcaagagagctgaacagg
MT1565	ARG4-0.5kb-F	TTGCGGCCGCGGATCcttattctactggatcttctc
MT1591	BamHI-phlO1-F	cgacTCTAGAGGATCCTATGTatgatacgaaacg
MT1631	salI-luxO10-F	GAGTCTTGActgcaggtcgACagcgtgttttttattccttaagttacgc
MT1632	NsiI-gal1-R	TTAGAACAGTTAAATTTTGatgcatccagaaataaggctaaaaaactaatcgc
MT1645	NLS-Sc-ICY2t-F	AGAGAAAGGTCTAAcctcgagCGCATTTTACCAC
MT1647	T38473-ClaI-R	gtttgatgccgatttcatcgattgtc
MT1736	NheI-Arg4-1Kb-F	gaccatgattacgccGCTAGCtcatcaagagagctgaacagg
MT1757	ARG4-BglII-R	ACTAAATAGTCGGCAAGATCTGTAG
MT1810	AOX1p-MFa-R	tgaaggaaatctcatACTAGTCGTTTCGAATAATTAGTTGTTTTTTG
MT1831	ARG4-phlO-F1	caggtcgactctagaggatccATGATACGAAACGTACCGTATCGTTAAGGTG
MT1834	ARG4-BglII-F	GGATATGCTGGCTACAGATCTTG
MT1932	phlO=AOX1p(167)-F	TATGTatgatacgaaacgtaccgtatcgtTAAGGTAGCGTCAGCAATATATAAACAGAAGGAAGCTG
MT1933	phlO=PAOX1(159)-R	cagggcagcttccttctgtttatacggatcacaaCgccACc
MT1934	PAOX1(159)-F	tataaacagaaggaagctgccctg
MT1941	luxO=PAOX1(159)-R	cagggcagcTTCCTTCTGTTTATAatccggatcacataCgTACC
MT1944	tetO=PAOX1(159)-R	CTTCTGTTTATATATTGCTGTCAAGTAGGGctaaaaaactaatcgcattatcatccac
MT1949	BamHI-phlO-F2	cgacTCTAGAGGATCCatgatacgaaacgtaccg
MT1950	phlO=DAS1p(262)-F	gatccatgatacgaaacgtaccgtatcgttaaggtAACAAGTTCAAATACCTATCTTTGGCAG
MT1951	phlO=DAS1p(232)-F	gatccatgatacgaaacgtaccgtatcgttaaggtCTTTTCCTCCTGCCTTTTTTAGCC
MT1952	phlO=DAS1p(202)-F	gatccatgatacgaaacgtaccgtatcgttaaggtCTCGGTTAGCCTCTAGGCAAATTC
MT1953	phlO=DAS1p(172)-F	gatccatgatacgaaacgtaccgtatcgttaaggtTCATACCTATATCAACTTTTCATCAGATAGC
MT1954	phlO=DAS1p(142)-F	gatccatgatacgaaacgtaccgtatcgttaaggtCCTTTGGGTTCAAAAAAGAACTAAAGC
MT1955	phlO=DAS1p(132)-F	gatccatgatacgaaacgtaccgtatcgttaaggtCAAAAAAGAACTAAAGCAGGATGCC
MT1956	phlO=DAS1p(122)-F	gatccatgatacgaaacgtaccgtatcgttaaggtCTAAAGCAGGATGCCTGATATATAAATC
MT1957	phlO=DAS1p(112)-F	GATCCATGATACGAAACGTACCGTATCGTTAAGGTATGCCTGATATATAAATCCCAGATGATC
MT1958	phlO=DAS1p(107)-F	gatccatgatacgaaacgtaccgtatcgttaaggtTGATATATAAATCCCAGATGATCTGC
MT1959	phlO=AOX1p(159)-F2	GGCGTTCAGCAATAtataaacagaaggaagctgc
MT1960	phlO=AOX1p(159)-R2	CTGtttataTATTGCTGAACGCCACCttaac
MT2005	TATA-tetO version-F	gataatgcTatCGatAGCAATATATAAACAGAAGGAAg
MT2006	TATA-tetO version-R	CTGTTTATATATTGCTatCGatAgcattatcatccacatac
MT2010	TATA-luxO version-F	ggtacGtatgtgaAGCAATAtataaacagaagg
MT2011	TATA-luxO version-R	ccttctgtttataTATTGCTtcacataCgtacctgtac
MT2027	AatII-F	aataatggtttcttagacgtcaggtg
MT2029	TKpGAP-F	cAAGCTTGCGGCCGCGGATCcatcgatttgtatgtgaaatagctgaaattcg
MT2030	TKpGAP-R	ttcgtaTCATACATAggatcccatgttcaattatagatccacgagtg
MT2032	BamHI-F	caggtcgacTCTAGAGGATC
MT2049	phlO=DAS1p(157)m-R	ctatctgatgaaaagagaccagaatttgCCaccttaac
MT2050	phlO=DAS1p(157)m-F	caaattctggtctcttttcatcagatagCCTTTGGG
MT2070	ARG4-HsBle-F	ttttgaagtggtacggcgatatccatggttgtgcgacagattcac
MT2081	3-trunc90ntAOX1-R	acccttagaaaccatACTAGTTTATGAAAGTAAGCTAATAATGATGATAAAAAAAAAGGTTTAAG
MT2082	3-trunc114ntAOX1-R	acccttagaaaccatACTAGTGATAAAAAAAAAGGTTTAAGACAGGGCAG
MT2088	DAS1-3-d30-R	acccttagaaaccatACTAGTCAATAGTTGTTTGTAAGTAAACGAATCaag
MT2089	DAS1-3-d50-R	acccttagaaaccatACTAGTACGAATCAAGATACTGAAAATAGTTTCAAAAG
MT2090	DAS1-3-d60-R	acccttagaaaccatACTAGTATACTGAAAATAGTTTCAAAAGCAGATCATC
MT2091	3-trunc75ntAOX1-R	acccttagaaaccatACTAGTTGGAACCAGTCGCAATTATGAAAG
MT2092	3-trunc133ntAOX1-R	acccttagaaaccatACTAGTGACAGGGCAGCTTCCTTCTG
MT2165	Vmut-N30-F1	gataacaatttcacacaggaaacagctaNNNNNNNNNNNNNNNNNNNNNNNNNNNNNNggatcctatgtatgatacgaaacg
MT2166	Vmut-N30-R1	tagctgtttcctgtgtgaaattgttatc
MT2193	delTATA-N9-F	gttCTAACCCCTACTTGACAGCANNNNNNNNNCAGAAGGAAgctgccctg
MT2194	pAOX1-R2	TGCTGTCAAGTAGGGGTTAGAACag
MT2581	phlO1-gal1-F	aaaactgtattataagtaaaATGATACGAAACGTacCGTATCgTTAAGGTagatatataaatgcaaaaactgcataaccac
MT2598	GAL1-68-R	CCATGTCGACGCTAGCgtaatacaaaccgaaaatgttgaaagtattagttaaag
MT2599	GAL1-91-R	CCATGTCGACGCTAGCcttttattacatttgaataagaagtaatacaaaccgaaaatg
MT2600	GAL1-119-R	CCATGTCGACGCTAGCgaggtatattaacaattttttgttgatacttttattacatttg
MT2649	lux(VF1725)3-F	cgctattacgccagcggatCcacctgtaaaatctatcagttGAacctgtaaaatctatcagttCAacctgtaaaatctatcagttacGtatgtgaAGCAATAtataaacag
MT2650	lux(VF1161)3-F	cgctattacgccagcggatCcaactgtaaaatcggacaggtGAaactgtaaaatcggacaggtCAaactgtaaaatcggacaggtacGtatgtgaAGCAATAtataaacag
MT2651	lux(VF1058)3-F	cgctattacgccagcggatCcacctgtaataaacgacaggaGAacctgtaataaacgacaggaCAacctgtaataaacgacaggaacGtatgtgaAGCAATAtataaacag
MT2895	tetOApaI-repeat-F	tatagggcgaattgggtaccggg
MT2896	tetOApaI-repeat-R	gagtaaactcgaggggggctaaaaaactaatcgcattatcatccac
MT3067	SacII-TULA-F	gccAAGCTTGCGGCCGCGGATCgggattatagatgtctttgtttgatagagctttg
MT3068	BaMHI-TULA-R	aTCATACATAggatccttgtaaataaagccaaagaagatgaagagtttgg
MT3069	SacII-TULA-F2	gccAAGCTTGCGGCCGCGGATCctttaccgtaggatttacttatacccaactg
MT3109	sacII-TULA-F3	gccAAGCTTGCGGCCGCGGATCtatagcgttgtttaggtcctctggttg
MT3110	BamHI-TULA1-R2	aTCATACATAggatccacgctatagaggaaaatcgaccgtttc
MT3111	BamHI-TerGAPDH-R2	aTCATACATAggatccggagcaattttccattccaatttgatcg
MT3112	SacII-ARG4-F	gccAAGCTTGCGGCCGCGGATCTAGAAGGGGAGTTCCATTCAGAGAAAC
MT960	SpeI-rtTA-F	ttttACTAGTgcgtcgacatgtctagactg
MT961	XhoI-rtTA-R	ttttCTCGAGgttagttacccggggagcatg
MT964	SpeI-phlTA-F	ttttACTAGTgcgtcgacATGGCTAGAAC
MT965	XhoI-phlTA-R	ttttCTCGAGgttagacctttctcttcttttttggtg
MTX01	Agr4-FinF NheI pUC192	gctatgaccatgattacgccgctagccatggttgtgcgacagattcac
MTX02	Agr4-RinF GAPprom	ggatcctctagagtcgacctgcagtcaagactctagcttttcattcag
MTX03	T36177-FinFMSC	cggatccactagtctcgagagatctttgcttagttctggaagacaagc
MTX04	T36177-RinF AscI	ttctctgcaattgaagatggcgcgccatcaaaatagttcgaatatggtgg
MTX05	T36177-FinF AscI	tattcgaactattttgatggcgcgccatcttcaattgcagagaattctgc
MTX06	T36177-RinF NAT	gcgctcttccgcttgaattcgctagcgaagtaagtcgctagatgatc
MTX07	GAPprom-FinF NotI forupper	gattacgccaagcttgcggccgcggatccttttttgtagaaatgtcttggtgtcc
MTX08	AOX1t-RinFXbaIT36177	gtcttccagaactaagcaatctagaaagcttgcacaaacgaacttc

## Sheet: Table S5. DNA parts
Supplementary Table 5. DNA parts used in this study
Name	Sequence	Source (Reference)
HygR cassette	ccgggtaccgagctcgaattcgccgtaccacttcaaaacacccaagcacagcatactaaatttcccctctttcttcctctagggtgtcgttaattacccgtactaaaggtttggaaaagaaaaaagagaccgcctcgtttctttttcttcgtcgaaaaaggcaataaaaatttttatcacgtttctttttcttgaaaatttttttttttgatttttttctctttcgatgacctcccattgatatttaagttaataaacggtcttcaatttctcaagtttcagtttcatttttcttgttctattacaactttttttacttcttgctcattagaaagaaagcatagcaatctaatctaagttttaattacaaaatgaagaagccagagttgactgctactt…	Y. Ito et al., Microbial Biotechnology, 15, 2364-2378 (2022) DOI: 10.1111/1751-7915.14061
G418R cassette	ggttccaacaacgttttgactgacaacggtagaatcactgctgttatcgactggtccgaagctatgttcggtgactctcaatacgaggttgctaacatcttcttttggagaccatggttggcttgtatggaacagcagactagatacttcgagagaagacacccagaattggctggttccccaagattgagagcttacatgttgagaatcggtttggaccagttgtaccagtccttggttgatggtaacttcgatgatgctgcttgggctcaaggtagatgtgacgctatcgttagatccggtgctggtactgttggtagaactcagattgctagaagatccgctgctgtttggactgacggttgtgttgaagttttggctgactccggtaacagaaga…	Y. Ito et al., Microbial Biotechnology, 15, 2364-2378 (2022) DOI: 10.1111/1751-7915.14061
BsdR cassette	gccgtaccacttcaaaacacccaagcacagcatactaaatttcccctctttcttcctctagggtgtcgttaattacccgtactaaaggtttggaaaagaaaaaagagaccgcctcgtttctttttcttcgtcgaaaaaggcaataaaaatttttatcacgtttctttttcttgaaaatttttttttttgatttttttctctttcgatgacctcccattgatatttaagttaataaacggtcttcaatttctcaagtttcagtttcatttttcttgttctattacaactttttttacttcttgctcattagaaagaaagcatagcaatctaatctaagttttaattacaaaatgaagactttcaacatctcccagcaggacttggagttggttgaagttg…	This study
ZeoR cassette	gccgtaccacttcaaaacacccaagcacagcatactaaattttccctctttcttcctctagggtgtcgttaattacccgtactaaaggtttggaaaagaaaaaagagaccgcctcgtttctttttcttcgtcgaaaaaggcaataaaaatttttatcacgtttctttttcttgaaatttttttttttagtttttttctctttcagtgacctccattgatatttaagttaataaacggtcttcaatttctcaagtttcagtttcatttttcttgttctattacaactttttttacttcttgttcattagaaagaaagcatagcaatctaatctaaggggcggtgttgacaattaatcatcggcatagtatatcggcatagtataatacgacaaggtgagg…	This study
synT36177	actgtacgacaggatgtcggttcgaaatgttgtaaacgtaccaaactttgatcatttatatttttttctgaatgtcgtaagcagtttgaaattttagtgtcttcgattataccaccatattcgaactattttgatGGCGCGCCatcttcaattgcagagaattctgcactcaactatactgtgcaatcggccctgttagattgagtatgtaatatatcagacagattaccaggcgagcgattaatggaagtgttttcagactgcagaattcccatgctaacagagcagtgagagtatgaagatggattttaatatcttcatgaaggcacaaatatgttcctctctttcgttttgcgttaccgtaaatgtcaaaaattctagagattcaaaagaattggc…	This study
synTULA1	gggattatagatgtctttgtttgatagagctttgtcttcgaaatttttgggtgttatccaatatattagtcaagtagccttcagaaatttcacgatccttcaataactctaaccgctcctgattccatcccgataatagctcgattaattgtgaattaaaacctttcatttctttcagtatatcttccaactcttgttccgacaaatggccgtcagtgtaatattgttcggattgtaagcgtctttcaatgttctgcacaatactatcactttcctcggtcaattgtttggccctttctgggctaacctctacgaatggtatgtcggtggctaatttgtccgtgctgtcagaaaatgagtctttaccgtaggatttacttatacccaactGGCGCGCCt…	This study
KpARG4	catggttgtgcgacagattcactgtgaaagactgttcattatacccacgtttcactgggagatgtaagccttaggtgttttaccctgattagataatacaataaccaacagaaatacgagaatctaaactaatttcgatgattcatttttctttttaccgcgctgcctcttttggcaattctttcacctatattctaccttctctttccttttgttctaaacttattaccagctatctatgtcgaatcaagaagaaggacttaaactgtggggtggcaggtttactggggctactgaccccttgatggatttgtataacgcttccttaccttacgacaagaaaatgtacaaggtggatttagaaggaacaaaagtttacactgagggcctggagaaaat…	This study
luxTA2-4F	gcgtcgacatgccagccgatgctttggatgatttcgatttggatatgttgcctgctgatgcattggacgattttgacttagacatgttaccagcagacgcattggatgacttcgaccttgatatgctaccaggtccaccaaaaaagaagagaaaggttgaaaacatcaacgctgatgacacctacagaatcatcaacaagattaaggcttgcaggtctaacaacgatattaaccagtgtttgtccgacatgaccaagatggttcattgcgaatattacttgttggccatcatctacccacactctatggttaagtccgacatttccattttggacaactacccaaaaaaatggcgtcagtattacgatgatgccaacttgattaagtacgacccaatcg…	M. Tominaga et al., Robust and flexible platform for directed evolution of yeast genetic switches. Nature Communications, 12, 1846 (2021)
phlTAE41G	gcgtcgacatggctagaactccatccagatcatctattggttctttgagatcaccacatactcataaggctattttgacctccaccatcgaaatcttgaaagaatgtggttactccggtttgtccattggatctgttgctagacgtgctggtgcttctaaacctactatctacagatggtggactaacaaggctgctttgattgctgaagtttacgaaaacgaatccgaacaggttagaaagtttccagatttgggttcctttaaggccgatttggatttcttgttgagaaacttgtggaaggtttggagagaaactatttgtggtgaagccttcagatgcgttattgcagaagctcaattagatccagctactttgactcaattgaaggaccaattca…	This study
rphlTA2-E1	gcgtcgacatggctagaacttcacccagatcatctattggttctctgagatcaccacatactcataaggctattttgacctccaccatcgaaatcttgaaagaatgtggttactccggtttgtccattgaatctgttgctagacgtgctggtgcttctaaacctactatctacagatggtggactaacaaggctgctttgattgctgaagtttacgaaaacgaatccgaacaggttagaaagtttccagatttgggttcctttacggccgatttggatttcttgttgagaaacttgtggaaggtttggagagaaactatttgtggtgaagccctcagatgcgttattgcagaagctcgattagatccagctactttgactcaattgaaggaccaattca…	M. Tominaga et al., Robust and flexible platform for directed evolution of yeast genetic switches. Nature Communications, 12, 1846 (2021)
rtetTAK8N	gcgtcgacatgtctagactggacaagagcaatgtcataaacggcgctctggaattactcaatggagtcggtatcgaaggcctgacgacaaggaaactcgctcaaaagctgggagttgagcagcctaccctgtactggcacgtgaagaacaagcgggccctgctcgatgccctgccaatcgagatgctggacaggcatcatacccacttctgccccctggaaggcgagtcatggcaagactttctgcggaacaacgccaagtcattccgctgtgctctcctctcacatcgcgacggggctaaagtgcatctcggcacccgcccaacagagaaacagtacgaaaccctggaaaatcagctcgcgttcctgtgtcagcaaggcttctccctggagaacgcac…	M. Tominaga et al., Robust and flexible platform for directed evolution of yeast genetic switches. Nature Communications, 12, 1846 (2021)
KpAOX1 promoter (PKpAOX1)	catgttggtattgtgaaatagacgcagatcgggaacactgaaaaataacagttattattcgagaactaacatccaaagacgaaaggttgaatgaaacctttttgccatccgacatccacaggtccattctcacacataagtgccaaacgcaacaggaggggatacactagcagcagaccgttgcaaacgcaggacctccactcctcttctcctcaacacccacttttgccatcgaaaaaccagcccagttattgggcttgattggagctcgctcattccaattccttctattaggctactaacaccatgactttattagcctgtctatcctggcccccctggcgaggttcatgtttgtttatttccgaatgcaacaagctccgcattacacccgaacat…	n/a
KpGAPDH promoter (PKpGAPDH)	ttttttgtagaaatgtcttggtgtcctcgtccaatcaggtagccatctctgaaatatctggctccgttgcaactccgaacgacctgctggcaacgtaaaattctccggggtaaaacttaaatgtggagtaatggaaccagaaacgtctcttcccttctctctccttccaccgcccgttaccgtccctaggaaattttactctgctggagagcttcttctacggcccccttgcagcaatgctcttcccagcattacgttgcgggtaaaacggaggtcgtgtacccgacctagcagcccagggatggaaaagtcccggccgtcgctggcaataatagcgggcggacgcatgtcatgagattattggaaaccaccagaatcgaatataaaaggcgaacacct…	n/a
KpYPT1 promoter (PKpYPT1)	gagtcacaatctgcttccacagacgagtacaaggacaggcaaaaggaattggaagaagttgctaacccaataatgagcaagttctatggagctgctggtggagctcctggtggagctcctggtggcttccctggaggtttccctggcggagctggcgcagctggcggtgccccaggtggtgctgccccaggcggagacagcggaccaaccgtggaagaagtcgattaagcaattcaacggataaattctggttaatatatataacgtgaataggaaattaaggaaattttggatctaataatgtgctgtatgccgacatcgggcatcgtagattgtatagtatcgctgacactataataagccagccaaaacccctaaaccagttgccctccactaatt…	n/a
ScPGK1 terminator (TScPGK1)	tcaaggagttcattattcaagtctataacccttcaaagttgaaagttcacgcagtaaacaccaacaacaaacgcagatcaaaactaaattgctctctctcattccaaaacacattaatcagctctttgcaagactacacagacaatctctatggatgctttattagcgggaacttggagattcccggcaagtatctattacaagttcataaaaacattatatctaacgaagaatgtttggtcgaaattggatctagttcgtcatttgagttatgggaacatcattaaacaaacttcttatctaccatctctgggtatttttcaataacatagtccaagtccttatcacctctaccacttagattgaccaaaatggtttgatcctttggtagagtcctgg…	Y. Ito et al., Exchange of endogenous and heterogeneous yeast terminators in Pichia pastoris to tune mRNA stability and gene expression. Nucleic Acids Research 48, 13000-13012 (2020).
ScICY2 terminator (TScICY2)	cgcattttaccacatctctacttgttctcacgaccccttgcatcgcatatcctacacattttaaatcggcattccttccaagcatattcttaattcctaattttacatagtttttttttttttttagagaaaataacaacaatatacatagaacttacttactcaattctactatatcttttttttttgttactattagtcatgtttgcatgactccattacattttcgtttttttgctagccaattctggtcgtcggaaaaacttttcattgaatctttcaaagcgtgtagcagttgcatttttttaaaaatgaatatgtatgcaaaatatatatatgtatatatatgcctaatatacataataatagaaaaaaaaaacctcatacgaaataggcgct…	Y. Ito et al., Exchange of endogenous and heterogeneous yeast terminators in Pichia pastoris to tune mRNA stability and gene expression. Nucleic Acids Research 48, 13000-13012 (2020).
KpGAPDH terminator (TKpGAPDH)	atcgatttgtatgtgaaatagctgaaattcgaaaatttcattatggctgtatctactttagcgtattaggcatttgagcattggcttgaacaatgcgggctgtagtgtgtcaccaaagaaaccattcgggttcggatctggaagtcctcatcacgtgatgccgatctcgtgtattttattttcagataacacctgaagacttttgggtcggaggactggctctttccgatcaaattggaatggaaaattgctcctctaagaaagggtgccaacactctttgtaacacaggacaccgtttattgctaactcgattgcattctttcctttcccacaccgggatctggtcttggtgaacaatctctcctgtccttatctaaatatatcatcgcactgtaacc…	Y. Ito et al., Exchange of endogenous and heterogeneous yeast terminators in Pichia pastoris to tune mRNA stability and gene expression. Nucleic Acids Research 48, 13000-13012 (2020).
MFα-2×Adv-ALX-0171-3A-FLAG-His	atgagatttccttcaatttttactgcagttttattcgcagcatcctccgcattagctgctccagtcaacactacaacagaagatgaaacggcacaaattccggctgaagctgtcatcggttactcagatttagaaggggatttcgatgctgctgttttgccattttccaacagcacaaataacgggttattgtttataaatactactattgccagcattgctgctaaagaagaaggggtatctttggataaaagactcgaggaagtccagttggttgaatccggtggtggtttggttcaagctggtggttctttgtctatctcctgtgctgcttccggtggttctctttccaactacgttcttggttggttcagacaggctccaggtaaagagagagaa…	M. Tominaga et al., under consideration
MFα-2×Adv-ALX-0081-3A-FLAG-His	atgagatttccttcaatttttactgcagttttattcgcagcatcctccgcattagctgctccagtcaacactacaacagaagatgaaacggcacaaattccggctgaagctgtcatcggttactcagatttagaaggggatttcgatgctgctgttttgccattttccaacagcacaaataacgggttattgtttataaatactactattgccagcattgctgctaaagaagaaggggtatctttggataaaagactcgaggaagtccagttggttgaatccggtggtggtttggttcaaccaggtggttctttgagattgtcctgtgctgcttccggtagaaccttctcttacaatccaatgggttggttcagacaggctccaggtaagggtagagaa…	M. Tominaga et al., under consideration
MFα-2×Adv-RBDom-His	atgagatttccttcaatttttactgcagttttattcgcagcatcctccgcattagctgctccagtcaacactacaacagaagatgaaacggcacaaattccggctgaagctgtcatcggttactcagatttagaaggggatttcgatgctgctgttttgccattttccaacagcacaaataacgggttattgtttataaatactactattgccagcattgctgctaaagaagaaggggtatctttggataaaagaatcaccaacttgtgcccattcgacgaggttttcaacgctactagattcgcttccgtttacgcctggaacagaaagagaatctccaactgcgttgctgactactccgtcttgtataacctggctccattcttcaccttcaagtgc…	This study
n/a, not applicable

## Sheet: Table S6 iSynPs
Supplementary Table 6. Inducble synthetic promoters used in this study
Name	Operator	Inducer	Core promoter	Host yeast	Sequence*	Related plasmid	Source
KpPhl1.1	1×phlO	2,4-diacetylphloroglucinol	KpAOX1 (-1 to -197)	Komagataella phaffii	GGATCCtatgtatgatacgaaacgtaccgtatcgttaaggtagcgtcaaaatttaactgttctaacccctacttgacagcaatatataaacagaaggaagctgccctgtcttaaacctttttttttatcatcattattagcttactttcataattgcgactggttccaattgacaagcttttgattttaacgacttttaacgacaacttgagaagatcaaaaaacaactaattattcgaaacgACTAGT	pKN108, pMT856, pMT949, pMT950, pMT951, pMT1434, pMT1521, pMT2076, pMT2077, pMT2092. pMT2093, pMT2094, pMT2095, pMT2096	This study
KpPhl1.2	1×phlO	2,4-diacetylphloroglucinol	KpAOX1 (-1 to -187)	Komagataella phaffii	GGATCCtatgtatgatacgaaacgtaccgtatcgttaaggtagcgtctgttctaacccctacttgacagcaatatataaacagaaggaagctgccctgtcttaaacctttttttttatcatcattattagcttactttcataattgcgactggttccaattgacaagcttttgattttaacgacttttaacgacaacttgagaagatcaaaaaacaactaattattcgaaacgACTAGT	pMT958	This study
KpPhl1.3	1×phlO	2,4-diacetylphloroglucinol	KpAOX1 (-1 to -177)	Komagataella phaffii	GGATCCtatgtatgatacgaaacgtaccgtatcgttaaggtagcgtccctacttgacagcaatatataaacagaaggaagctgccctgtcttaaacctttttttttatcatcattattagcttactttcataattgcgactggttccaattgacaagcttttgattttaacgacttttaacgacaacttgagaagatcaaaaaacaactaattattcgaaacgACTAGT	pMT959	This study
KpPhl1.4	1×phlO	2,4-diacetylphloroglucinol	KpAOX1 (-1 to -207)	Komagataella phaffii	GGATCCtatgtatgatacgaaacgtaccgtatcgttaaggtagcgtcgttcatgatcaaaatttaactgttctaacccctacttgacagcaatatataaacagaaggaagctgccctgtcttaaacctttttttttatcatcattattagcttactttcataattgcgactggttccaattgacaagcttttgattttaacgacttttaacgacaacttgagaagatcaaaaaacaactaattattcgaaacgACTAGT	pMT960	This study
KpPhl1.5	1×phlO	2,4-diacetylphloroglucinol	KpAOX1 (-1 to -237)	Komagataella phaffii	GGATCCtatgtatgatacgaaacgtaccgtatcgttaaggtagcgtattctggtgggaatactgctgatagcctaacgttcatgatcaaaatttaactgttctaacccctacttgacagcaatatataaacagaaggaagctgccctgtcttaaacctttttttttatcatcattattagcttactttcataattgcgactggttccaattgacaagcttttgattttaacgacttttaacgacaacttgagaagatcaaaaaacaactaattattcgaaacgACTAGT	pMT961	This study
KpPhl1.6	1×phlO	2,4-diacetylphloroglucinol	KpAOX1 (-1 to -167)	Komagataella phaffii	GGATCCtatgtatgatacgaaacgtaccgtatcgttaaggtagcgtcagcaatatataaacagaaggaagctgccctgtcttaaacctttttttttatcatcattattagcttactttcataattgcgactggttccaattgacaagcttttgattttaacgacttttaacgacaacttgagaagatcaaaaaacaactaattattcgaaacgACTAGT	pMT1328	This study
KpPhl1.7	1×phlO	2,4-diacetylphloroglucinol	KpDAS1 (-1 to -262)	Komagataella phaffii	GGATCCatgatacgaaacgtaccgtatcgttaaggtaacaagttcaaatacctatctttggcaggacttttcctcctgccttttttagcctcaggtctcggttagcctctaggcaaattctggtcttcatacctatatcaacttttcatcagatagcctttgggttcaaaaaagaactaaagcaggatgcctgatatataaatcccagatgatctgcttttgaaactattttcagtatcttgattcgtttacttacaaacaactattgttgattttatctggagaataatcgaacaaaACTAGT	pMT1341	This study
KpPhl1.8	1×phlO	2,4-diacetylphloroglucinol	KpDAS1 (-1 to -232)	Komagataella phaffii	GGATCCatgatacgaaacgtaccgtatcgttaaggtcttttcctcctgccttttttagcctcaggtctcggttagcctctaggcaaattctggtcttcatacctatatcaacttttcatcagatagcctttgggttcaaaaaagaactaaagcaggatgcctgatatataaatcccagatgatctgcttttgaaactattttcagtatcttgattcgtttacttacaaacaactattgttgattttatctggagaataatcgaacaaaACTAGT	pMT1342	This study
KpPhl1.9	1×phlO	2,4-diacetylphloroglucinol	KpDAS1 (-1 to -202)	Komagataella phaffii	GGATCCatgatacgaaacgtaccgtatcgttaaggtctcggttagcctctaggcaaattctggtcttcatacctatatcaacttttcatcagatagcctttgggttcaaaaaagaactaaagcaggatgcctgatatataaatcccagatgatctgcttttgaaactattttcagtatcttgattcgtttacttacaaacaactattgttgattttatctggagaataatcgaacaaaACTAGT	pMT1343	This study
KpPhl1.10	1×phlO	2,4-diacetylphloroglucinol	KpDAS1 (-1 to -172)	Komagataella phaffii	GGATCCatgatacgaaacgtaccgtatcgttaaggttcatacctatatcaacttttcatcagatagcctttgggttcaaaaaagaactaaagcaggatgcctgatatataaatcccagatgatctgcttttgaaactattttcagtatcttgattcgtttacttacaaacaactattgttgattttatctggagaataatcgaacaaaACTAGT	pMT1344	This study
KpPhl1.11	1×phlO	2,4-diacetylphloroglucinol	KpDAS1 (-1 to -142)	Komagataella phaffii	GGATCCatgatacgaaacgtaccgtatcgttaaggtcctttgggttcaaaaaagaactaaagcaggatgcctgatatataaatcccagatgatctgcttttgaaactattttcagtatcttgattcgtttacttacaaacaactattgttgattttatctggagaataatcgaacaaaACTAGT	pMT1345	This study
KpPhl1.12	1×phlO	2,4-diacetylphloroglucinol	KpDAS1 (-1 to -132)	Komagataella phaffii	GGATCCatgatacgaaacgtaccgtatcgttaaggtcaaaaaagaactaaagcaggatgcctgatatataaatcccagatgatctgcttttgaaactattttcagtatcttgattcgtttacttacaaacaactattgttgattttatctggagaataatcgaacaaaACTAGT	pMT1346	This study
KpPhl1.13	1×phlO	2,4-diacetylphloroglucinol	KpDAS1 (-1 to -122)	Komagataella phaffii	GGATCCatgatacgaaacgtaccgtatcgttaaggtctaaagcaggatgcctgatatataaatcccagatgatctgcttttgaaactattttcagtatcttgattcgtttacttacaaacaactattgttgattttatctggagaataatcgaacaaaACTAGT	pMT1347	This study
KpPhl1.14	1×phlO	2,4-diacetylphloroglucinol	KpDAS1 (-1 to -112)	Komagataella phaffii	GGATCCatgatacgaaacgtaccgtatcgttaaggtatgcctgatatataaatcccagatgatctgcttttgaaactattttcagtatcttgattcgtttacttacaaacaactattgttgattttatctggagaataatcgaacaaaACTAGT	pMT1348	This study
KpPhl1.15	1×phlO	2,4-diacetylphloroglucinol	KpDAS1 (-1 to -107)	Komagataella phaffii	GGATCCatgatacgaaacgtaccgtatcgttaaggttgatatataaatcccagatgatctgcttttgaaactattttcagtatcttgattcgtttacttacaaacaactattgttgattttatctggagaataatcgaacaaaACTAGT	pMT1349	This study
KpPhl1.16	1×phlO	2,4-diacetylphloroglucinol	KpDAS1 (-1 to -188[Δ-163 to -173])	Komagataella phaffii	GGATCCatgatacgaaacgtaccgtatcgttaaggtggcaaattctggtctcttttcatcagatagcctttgggttcaaaaaagaactaaagcaggatgcctgatatataaatcccagatgatctgcttttgaaactattttcagtatcttgattcgtttacttacaaacaactattgttgattttatctggagaataatcgaacaaaACTAGT	pMT1449	This study
KpPhl1.17	1×phlO	2,4-diacetylphloroglucinol	KpAOX1 (-1 to -107)	Komagataella phaffii	GGATCCtatgtatgatacgaaacgtaccgtatcgttaaggtagcgtcaaaatttaactgttctaacccctacttgacagcaatatataaacagaaggaagctgccctgtcttaaacctttttttttatcatcattattagcttactttcataaACTAGT	pMT1473	This study
KpPhl1.18	1×phlO	2,4-diacetylphloroglucinol	KpAOX1 (-1 to -83)	Komagataella phaffii	GGATCCtatgtatgatacgaaacgtaccgtatcgttaaggtagcgtcaaaatttaactgttctaacccctacttgacagcaatatataaacagaaggaagctgccctgtcttaaacctttttttttatcACTAGT	pMT1474	This study
KpPhl1.19	1×phlO	2,4-diacetylphloroglucinol	KpAOX1 (-1 to -53)	Komagataella phaffii	GGATCCtatgtatgatacgaaacgtaccgtatcgttaaggtagcgtcagcaatatataaacagaaggaagctgccctgtcttaaacctttttttttatcACTAGT	pMT1475	This study
KpPhl1.20	1×phlO	2,4-diacetylphloroglucinol	KpDAS1 (-31 to -107)	Komagataella phaffii	GGATCCatgatacgaaacgtaccgtatcgttaaggttgatatataaatcccagatgatctgcttttgaaactattttcagtatcttgattcgtttacttacaaacaactattgACTAGT	pMT1481	This study
KpPhl1.21	1×phlO	2,4-diacetylphloroglucinol	KpDAS1 (-51 to -107)	Komagataella phaffii	GGATCCatgatacgaaacgtaccgtatcgttaaggttgatatataaatcccagatgatctgcttttgaaactattttcagtatcttgattcgtACTAGT	pMT1482	This study
KpPhl1.22	1×phlO	2,4-diacetylphloroglucinol	DAS1 (-61 to -107)	Komagataella phaffii	GGATCCatgatacgaaacgtaccgtatcgttaaggttgatatataaatcccagatgatctgcttttgaaactattttcagtatACTAGT	pMT1483	This study
KpPhl1.23	1×phlO	2,4-diacetylphloroglucinol	KpAOX1 (-76 to -197)	Komagataella phaffii	GGATCCtatgtatgatacgaaacgtaccgtatcgttaaggtagcgtcaaaatttaactgttctaacccctacttgacagcaatatataaacagaaggaagctgccctgtcttaaacctttttttttatcatcattattagcttactttcataattgcgactggttccaACTAGT	pMT1487	This study
KpPhl1.1-TATALib	1×phlO	2,4-diacetylphloroglucinol	KpAOX1 (-1 to -197)	Komagataella phaffii	GGATCCtatgtatgatacgaaacgtaccgtatcgttaaggtagcgtcaaaatttaactgttctaacccctacttgacagcannnnnnnnncagaaggaagctgccctgtcttaaacctttttttttatcatcattattagcttactttcataattgcgactggttccaattgacaagcttttgattttaacgacttttaacgacaacttgagaagatcaaaaaacaactaattattcgaaacgACTAGT	pMT1550	This study
KpPhl2.1	2×phlO	2,4-diacetylphloroglucinol	KpAOX1 (-1 to -167)	Komagataella phaffii	GGATCCatgatacgaaacgtaccgtatcgttaaggtagatgatacgaaacgtaccgtatcgttaaggtggcgttcagcaatatataaacagaaggaagctgccctgtcttaaacctttttttttatcatcattattagcttactttcataattgcgactggttccaattgacaagcttttgattttaacgacttttaacgacaacttgagaagatcaaaaaacaactaattattcgaaacgACTAGT	pMT1350	This study
KpPhl6.0	6×phlO	2,4-diacetylphloroglucinol	KpAOX1 (-1 to -197)	Komagataella phaffii	GGATCCatgatacgaaacgtaccgtatcgttaaggtgaatgatacgaaacgtaccgtatcgttaaggtcaatgatacgaaacgtaccgtatcgttaaggtcaatgatacgaaacgtaccgtatcgttaaggtgtatgatacgaaacgtaccgtatcgttaaggtagatgatacgaaacgtaccgtatcgttaaggtggcgttgtgatccggatgataatgcgcaaaatttaactgttctaacccctacttgacagcaatatataaacagaaggaagctgccctgtcttaaacctttttttttatcatcattattagcttactttcataattgcgactggttccaattgacaagcttttgattttaacgacttttaacgacaacttgagaagatcaaaaa…	pMT952, pMT1219, pYI2165, pYI2216	This study
KpPhl6.1	6×phlO	2,4-diacetylphloroglucinol	KpAOX1 (-1 to -167)	Komagataella phaffii	GGATCCatgatacgaaacgtaccgtatcgttaaggtgaatgatacgaaacgtaccgtatcgttaaggtcaatgatacgaaacgtaccgtatcgttaaggtcaatgatacgaaacgtaccgtatcgttaaggtgtatgatacgaaacgtaccgtatcgttaaggtagatgatacgaaacgtaccgtatcgttaaggtggcgttcagcaatatataaacagaaggaagctgccctgtcttaaacctttttttttatcatcattattagcttactttcataattgcgactggttccaattgacaagcttttgattttaacgacttttaacgacaacttgagaagatcaaaaaacaactaattattcgaaacgACTAGT	pMT1351	This study
KpPhl12.1	12×phlO	2,4-diacetylphloroglucinol	KpAOX1 (-1 to -167)	Komagataella phaffii	GGATCCatgatacgaaacgtaccgtatcgttaaggtgaatgatacgaaacgtaccgtatcgttaaggtcaatgatacgaaacgtaccgtatcgttaaggtcaatgatacgaaacgtaccgtatcgttaaggtgtatgatacgaaacgtaccgtatcgttaaggtagatgatacgaaacgtaccgtatcgttaaggtggcgttgtgatccggagatccatgatacgaaacgtaccgtatcgttaaggtgaatgatacgaaacgtaccgtatcgttaaggtcaatgatacgaaacgtaccgtatcgttaaggtcaatgatacgaaacgtaccgtatcgttaaggtgtatgatacgaaacgtaccgtatcgttaaggtagatgatacgaaacgtaccgtatc…	pMT1980	This study
KpPhl18.1	18×phlO	2,4-diacetylphloroglucinol	KpAOX1 (-1 to -167)	Komagataella phaffii	GGATCCatgatacgaaacgtaccgtatcgttaaggtgaatgatacgaaacgtaccgtatcgttaaggtcaatgatacgaaacgtaccgtatcgttaaggtcaatgatacgaaacgtaccgtatcgttaaggtgtatgatacgaaacgtaccgtatcgttaaggtagatgatacgaaacgtaccgtatcgttaaggtggcgttgtgatccggagatccatgatacgaaacgtaccgtatcgttaaggtgaatgatacgaaacgtaccgtatcgttaaggtcaatgatacgaaacgtaccgtatcgttaaggtcaatgatacgaaacgtaccgtatcgttaaggtgtatgatacgaaacgtaccgtatcgttaaggtagatgatacgaaacgtaccgtatc…	pMT1981	This study
KpTc1.1	1×tetO2	Doxycycline	KpAOX1 (-1 to -162)	Komagataella phaffii	GGATCCcgactcactatagggcgaattgggtaccgggccccccctcgagtttactccctatcagtgatagagaacgtatgtggatgataatgctatcgatagcaatatataaacagaaggaagctgccctgtcttaaacctttttttttatcatcattattagcttactttcataattgcgactggttccaattgacaagcttttgattttaacgacttttaacgacaacttgagaagatcaaaaaacaactaattattcgaaacgACTAGT	pMT2086	This study
KpTc3.1	3×tetO2	Doxycycline	KpAOX1 (-1 to -162)	Komagataella phaffii	GGATCCcgactcactatagggcgaattgggtaccgggccccccctcgagtttactccctatcagtgatagagaacgtatgtcgagtttatccctatcagtgatagagaacgtatgtcgagtttactccctatcagtgatagagaacgtatgtggatgataatgctatcgatagcaatatataaacagaaggaagctgccctgtcttaaacctttttttttatcatcattattagcttactttcataattgcgactggttccaattgacaagcttttgattttaacgacttttaacgacaacttgagaagatcaaaaaacaactaattattcgaaacgACTAGT	pMT2080	This study
KpTc5.1	5×tetO2	Doxycycline	KpAOX1 (-1 to -162)	Komagataella phaffii	GGATCCcgactcactatagggcgaattgggtaccgggccccccctcgagtttactccctatcagtgatagagaacgtatgtcgagtttactccctatcagtgatagagaacgtatgtcgagtttactccctatcagtgatagagaacgtatgtcgagtttatccctatcagtgatagagaacgtatgtcgagtttactccctatcagtgatagagaacgtatgtggatgataatgctatcgatagcaatatataaacagaaggaagctgccctgtcttaaacctttttttttatcatcattattagcttactttcataattgcgactggttccaattgacaagcttttgattttaacgacttttaacgacaacttgagaagatcaaaaaacaactaatt…	pMT2081	This study
KpTc7.1	7×tetO2	Doxycycline	KpAOX1 (-1 to -162)	Komagataella phaffii	GGATCCcgactcactatagggcgaattgggtaccgggccccccctcgagtttactccctatcagtgatagagaacgtatgtcgagtttactccctatcagtgatagagaacgatgtcgagtttactccctatcagtgatagagaacgtatgtcgagtttactccctatcagtgatagagaacgtatgtcgagtttactccctatcagtgatagagaacgtatgtcgagtttatccctatcagtgatagagaacgtatgtcgagtttactccctatcagtgatagagaacgtatgtggatgataatgctatcgatagcaatatataaacagaaggaagctgccctgtcttaaacctttttttttatcatcattattagcttactttcataattgcgactg…	pMT1419, pMT1461	This study
KpTc14.1	14×tetO2	Doxycycline	KpAOX1 (-1 to -162)	Komagataella phaffii	GGATCCcgactcactatagggcgaattgggtaccgggccccccctcgagtttactccctatcagtgatagagaacgtatgtcgagtttactccctatcagtgatagagaacgatgtcgagtttactccctatcagtgatagagaacgtatgtcgagtttactccctatcagtgatagagaacgtatgtcgagtttactccctatcagtgatagagaacgtatgtcgagtttatccctatcagtgatagagaacgtatgtcgagtttactccctatcagtgatagagaacgtatgtggatgataatgcgattagttttttagcccccctcgagtttactccctatcagtgatagagaacgtatgtcgagtttactccctatcagtgatagagaacgatgt…	pMT2013	This study
KpHsl5.0	5×luxO	N-(ketocaproyl)-D,L-homoserine lactone	KpAOX1 (-1 to -197)	Komagataella phaffii	GTCGACagcgtgttttttattccttaagttacgcaaggtcgaacataagtacctgtaggatcgtacaggtttacgcaaggtcgaacataagtacctgtaggatcgtacaggtcgctattacgccagcGGATCCacctgtaggatcgtacaggtgaacctgtaggatcgtacaggtcaacctgtaggatcgtacaggtacgtatgtgatccggatgataatgcgattagttttttagccttatttctggatgcatcaaaatttaactgttctaacccctacttgacagcaatatataaacagaaggaagctgccctgtcttaaacctttttttttatcatcattattagcttactttcataattgcgactggttccaattgacaagcttttgattttaac…	pMT1014	This study
KpHsl5.1	5×luxO	N-(ketocaproyl)-D,L-homoserine lactone	KpAOX1 (-1 to -166)	Komagataella phaffii	GTCGACagcgtgttttttattccttaagttacgcaaggtcgaacataagtacctgtaggatcgtacaggtttacgcaaggtcgaacataagtacctgtaggatcgtacaggtcgctattacgccagcggatccacctgtaggatcgtacaggtgaacctgtaggatcgtacaggtcaacctgtaggatcgtacaggtacgtatgtgaagcaatatataaacagaaggaagctgccctgtcttaaacctttttttttatcatcattattagcttactttcataattgcgactggttccaattgacaagcttttgattttaacgacttttaacgacaacttgagaagatcaaaaaacaactaattattcgaaacgACTAGT	pMT1420	This study
KpHsl5.2	2×luxO + 3×luxO1725	N-(ketocaproyl)-D,L-homoserine lactone	KpAOX1 (-1 to -166)	Komagataella phaffii	GTCGACagcgtgttttttattccttaagttacgcaaggtcgaacataagtacctgtaggatcgtacaggtttacgcaaggtcgaacataagtacctgtaggatcgtacaggtcgctattacgccagcggatccacctgtaaaatctatcagttgaacctgtaaaatctatcagttcaacctgtaaaatctatcagttacgtatgtgaagcaatatataaacagaaggaagctgccctgtcttaaacctttttttttatcatcattattagcttactttcataattgcgactggttccaattgacaagcttttgattttaacgacttttaacgacaacttgagaagatcaaaaaacaactaattattcgaaacgACTAGT	pMT1856	This study
KpHsl5.3	2×luxO + 3×luxO1161	N-(ketocaproyl)-D,L-homoserine lactone	KpAOX1 (-1 to -166)	Komagataella phaffii	GTCGACagcgtgttttttattccttaagttacgcaaggtcgaacataagtacctgtaggatcgtacaggtttacgcaaggtcgaacataagtacctgtaggatcgtacaggtcgctattacgccagcggatccaactgtaaaatcggacaggtgaaactgtaaaatcggacaggtcaaactgtaaaatcggacaggtacgtatgtgaagcaatatataaacagaaggaagctgccctgtcttaaacctttttttttatcatcattattagcttactttcataattgcgactggttccaattgacaagcttttgattttaacgacttttaacgacaacttgagaagatcaaaaaacaactaattattcgaaacgACTAGT	pMT1857	This study
KpHsl5.4	2×luxO + 3×luxO1058	N-(ketocaproyl)-D,L-homoserine lactone	KpAOX1 (-1 to -166)	Komagataella phaffii	GTCGACagcgtgttttttattccttaagttacgcaaggtcgaacataagtacctgtaggatcgtacaggtttacgcaaggtcgaacataagtacctgtaggatcgtacaggtcgctattacgccagcggatccacctgtaataaacgacaggagaacctgtaataaacgacaggacaacctgtaataaacgacaggaacgtatgtgaagcaatatataaacagaaggaagctgccctgtcttaaacctttttttttatcatcattattagcttactttcataattgcgactggttccaattgacaagcttttgattttaacgacttttaacgacaacttgagaagatcaaaaaacaactaattattcgaaacgACTAGT	pMT1858	This study
KpHsl10.1	10×luxO	N-(ketocaproyl)-D,L-homoserine lactone	KpAOX1 (-1 to -166)	Komagataella phaffii	GTCGACagcgtgttttttattccttaagttacgcaaggtcgaacataagtacctgtaggatcgtacaggtttacgcaaggtcgaacataagtacctgtaggatcgtacaggtcgctattacgccagcggatccacctgtaggatcgtacaggtgaacctgtaggatcgtacaggtcaacctgtaggatcgtacaggtacgtatgtgatccggatgataatgttaagttacgcaaggtcgaacataagtacctgtaggatcgtacaggtttacgcaaggtcgaacataagtacctgtaggatcgtacaggtcgctattacgccagcggatccacctgtaggatcgtacaggtgaacctgtaggatcgtacaggtcaacctgtaggatcgtacaggtacgt…	pMT1883	This study
KpHsl10.2	7×luxO + 3×luxO1161	N-(ketocaproyl)-D,L-homoserine lactone	KpAOX1 (-1 to -166)	Komagataella phaffii	GTCGACagcgtgttttttattccttaagttacgcaaggtcgaacataagtacctgtaggatcgtacaggtttacgcaaggtcgaacataagtacctgtaggatcgtacaggtcgctattacgccagcggatccacctgtaggatcgtacaggtgaacctgtaggatcgtacaggtcaacctgtaggatcgtacaggtacgtatgtgatccggatgataatgttaagttacgcaaggtcgaacataagtacctgtaggatcgtacaggtttacgcaaggtcgaacataagtacctgtaggatcgtacaggtcgctattacgccagcggatccaactgtaaaatcggacaggtgaaactgtaaaatcggacaggtcaaactgtaaaatcggacaggtacgt…	pMT1876	This study
KpHsl15.1	12×luxO + 3×luxO1161	N-(ketocaproyl)-D,L-homoserine lactone	KpAOX1 (-1 to -166)	Komagataella phaffii	GTCGACagcgtgttttttattccttaagttacgcaaggtcgaacataagtacctgtaggatcgtacaggtttacgcaaggtcgaacataagtacctgtaggatcgtacaggtcgctattacgccagcggatccacctgtaggatcgtacaggtgaacctgtaggatcgtacaggtcaacctgtaggatcgtacaggtacgtatgtgatccggatgataatgttaagttacgcaaggtcgaacataagtacctgtaggatcgtacaggtttacgcaaggtcgaacataagtacctgtaggatcgtacaggtcgctattacgccagcggatccacctgtaggatcgtacaggtgaacctgtaggatcgtacaggtcaacctgtaggatcgtacaggtacgt…	pMT1877	This study
pphlO6	6×phlO	2,4-diacetylphloroglucinol	ScGAL1 (-1 to -228)	Saccharomyces cerevisiae	GGATCCatgatacgaaacgtaccgtatcgttaaggtgaatgatacgaaacgtaccgtatcgttaaggtcaatgatacgaaacgtaccgtatcgttaaggtcaatgatacgaaacgtaccgtatcgttaaggtgtatgatacgaaacgtaccgtatcgttaaggtagatgatacgaaacgtaccgtatcgttaaggtggcgttgtgatccggatgataatgcgattagttttttagccttatttctggggtaattaatcagcgaagcgatgatttttgatctattaacagatatataaatgcaaaaactgcataaccactttaactaatactttcaacattttcggtttgtattacttcttattcaaatgtaataaaagtatcaacaaaaaattgttaat…	pMT916	M. Tominaga et al., Robust and flexible platform for directed evolution of yeast genetic switches. Nature Communications, 12, 1846 (2021)
ScPhl1.1	1×phlO	2,4-diacetylphloroglucinol	ScGAL1 (-1 to -150)	Saccharomyces cerevisiae	atgatacgaaacgtaccgtatcgttaaggtagatatataaatgcaaaaactgcataaccactttaactaatactttcaacattttcggtttgtattacttcttattcaaatgtaataaaagtatcaacaaaaaattgttaatatacctctatactttaacgtcaaggagaaaaaactataGCTAGCGTCGAC	pMT1804	This study
ScPhl1.4	1×phlO	2,4-diacetylphloroglucinol	ScGAL1 (-83 to -150)	Saccharomyces cerevisiae	atgatacgaaacgtaccgtatcgttaaggtagatatataaatgcaaaaactgcataaccactttaactaatactttcaacattttcggtttgtattacGCTAGCGTCGAC	pMT1812	This study
ScPhl1.3	1×phlO	2,4-diacetylphloroglucinol	ScGAL1 (-60 to -150)	Saccharomyces cerevisiae	atgatacgaaacgtaccgtatcgttaaggtagatatataaatgcaaaaactgcataaccactttaactaatactttcaacattttcggtttgtattacttcttattcaaatgtaataaaagGCTAGCGTCGAC	pMT1813	This study
ScPhl1.2	1×phlO	2,4-diacetylphloroglucinol	ScGAL1 (-32 to -150)	Saccharomyces cerevisiae	atgatacgaaacgtaccgtatcgttaaggtagatatataaatgcaaaaactgcataaccactttaactaatactttcaacattttcggtttgtattacttcttattcaaatgtaataaaagtatcaacaaaaaattgttaatatacctcGCTAGCGTCGAC	pMT1814	This study
n/a, not applicable
*Restriction sites (BamHI, NheI, SpaI, SalI, and PstI) are indicated in bold and capitalized.

## Sheet: Table S7 Insulators
Supplementary Table 7. Insulator sequences used in this study
Plasmid	Insulator sequence with upstream SacII site*	Source	Insulator length (bp)
pMT949	CCGCGGatccatggttgtgcgacagattcactgtgaaagactgttcattatacccacgtttcactgggagatgtaagccttaggtgttttaccctgattagataatacaataaccaacagaaatacgagaatctaaactaatttcgatgattcatttttctttttaccgcgctgcctcttttggcaattctttcacctatattctaccttctctttccttttgttctaaacttattaccagctatctatgtcgaatcaagaagaaggacttaaactgtggggtggcaggtttactggggctactgaccccttgatggatttgtataacgcttccttaccttacgacaagaaaatgtacaaggtggatttagaaggaacaaaagtttacactgagggcct…	KpARG4 gene and its upstream sequence	1663
pMT950	CCGCGGatctcatcaagagagctgaacaggaaatagacgtcttgatgcccggttatactcacttgcaaagagctcaaccaatcagatggtctcactggttgagcatgtatgctacctatttcactgaagattatgagagactgaatcaaatcgttaaaaggttgaacaaatccccattgggagctggagctttggctggtcatccttatggaattgatcgtgaatacattgctgagagattagggtttgattctgttattggtaattctttggccgctgtttcagacagagattttgtagtcgaaaccatgttctggtcttcgttgtttatgaatcatatttctcgattctcagaagatttgatcatttactccactggagagtttggatttatcaagt…	Partial sequence of KpARG4 gene	989
pMT951	CCGCGGatccttattctactggatcttctctgatgcctcaaaaaaaaaacccagactctttggagttattgaggggtaaatctggtagatgttttggggccttggctggtttcctcatgtctattaagtccattccgtcaacctataacaaagatatgcaagaggataaggagcctttatttgatactctaatcactgtagagcactcgattttgatagcatccggtgtagtttctaccttgaacattgatgccgaacgaatgaagaatgctctaactatggatatgctggctacagatcttgccgactatttagttagaaggggagttccattcagagaaactcaccacatttctggtgaatgtgtcagacaagccgaggagttgaacctttctggta…	Partial sequence of KpARG4 gene	590
pMT1434	CCGCGGatccatcgatttgtatgtgaaatagctgaaattcgaaaatttcattatggctgtatctactttagcgtattaggcatttgagcattggcttgaacaatgcgggctgtagtgtgtcaccaaagaaaccattcgggttcggatctggaagtcctcatcacgtgatgccgatctcgtgtattttattttcagataacacctgaagacttttgggtcggaggactggctctttccgatcaaattggaatggaaaattgctcctctaagaaagggtgccaacactctttgtaacacaggacaccgtttattgctaactcgattgcattctttcctttcccacaccgggatctggtcttggtgaacaatctctcctgtccttatctaaatatatcatcg…	Downstream sequence of KpGAPDH gene	503
pMT2076	CCGCGGatcgggattatagatgtctttgtttgatagagctttgtcttcgaaatttttgggtgttatccaatatattagtcaagtagccttcagaaatttcacgatccttcaataactctaaccgctcctgattccatcccgataatagctcgattaattgtgaattaaaacctttcatttctttcagtatatcttccaactcttgttccgacaaatggccgtcagtgtaatattgttcggattgtaagcgtctttcaatgttctgcacaatactatcactttcctcggtcaattgtttggccctttctgggctaacctctacgaatggtatgtcggtggctaatttgtccgtgctgtcagaaaatgagtctttaccgtaggatttacttatacccaact…	Downstream sequence of KpULA1 gene (AscI site inserted)	797
pMT2077	CCGCGGatcctttaccgtaggatttacttatacccaactggcgcgcctcctttctcttggatatagctcatccagatcaaagggaatgcttaaattgagaaatagctgtctccttataatactttgtttccaattcaactgttgaagattatttggctcacttgatagttggtttaacaatgccctagccctttcatcaagaaacggtcgattttcctctatagcgttgtttaggtcctctggttgcactcctagtataccattcacaatcttgacaactttttcatcactcttactatccgattgttctaagtcttcaattgagagagtactgaacgatctcgttggttcatctagctctggcgcagcctcaaattcctcaaaagaggcatcagaaaa…	Downstream sequence of KpULA1 gene (AscI site inserted)	437
pMT2092	CCGCGGatctatagcgttgtttaggtcctctggttgcactcctagtataccattcacaatcttgacaactttttcatcactcttactatccgattgttctaagtcttcaattgagagagtactgaacgatctcgttggttcatctagctctggcgcagcctcaaattcctcaaaagaggcatcagaaaacgagccaaactcttcatcttctttggctttatttacaaGGATCC	Downstream sequence of KpULA1 gene	227
pMT2093	CCGCGGatcctttaccgtaggatttacttatacccaactggcgcgcctcctttctcttggatatagctcatccagatcaaagggaatgcttaaattgagaaatagctgtctccttataatactttgtttccaattcaactgttgaagattatttggctcacttgatagttggtttaacaatgccctagccctttcatcaagaaacggtcgattttcctctatagcgtGGATCC	Downstream sequence of KpULA1 gene (AscI site inserted)	227
pMT2094	CCGCGGatcgggattatagatgtctttgtttgatagagctttgtcttcgaaatttttgggtgttatccaatatattagtcaagtagccttcagaaatttcacgatccttcaataactctaaccgctcctgattccatcccgataatagctcgattaattgtgaattaaaacctttcatttctttcagtatatcttccaactcttgttccgacaaatggccgtcagtgtaatattgttcggattgtaagcgtctttcaatgttctgcacaatactatcactttcctcggtcaattgtttggccctttctgggctaacctctacgaatggtatgtcggtggctaatttgtccgtgctgtcagaaaatgagtctttaccgtaggatttacttatacccaact…	Downstream sequence of KpULA1 gene (AscI site inserted)	587
pMT2095	CCGCGGatccatcgatttgtatgtgaaatagctgaaattcgaaaatttcattatggctgtatctactttagcgtattaggcatttgagcattggcttgaacaatgcgggctgtagtgtgtcaccaaagaaaccattcgggttcggatctggaagtcctcatcacgtgatgccgatctcgtgtattttattttcagataacacctgaagacttttgggtcggaggactggctctttccgatcaaattggaatggaaaattgctccGGATCC	Downstream sequence of KpGAPDH gene	264
pMT2096	CCGCGGatctagaaggggagttccattcagagaaactcaccacatttctggtgaatgtgtcagacaagccgaggagttgaacctttctggtattgatcagttgtccctcgaacaattgaaatccattgactcccgttttgaggctgatgtggcttcaacgtttgactttgaagccagtgttgaaaaaagaactgccaccggaggaacttctaagactgctgttttaaagcaattggatgcactgaatgaaaagctagagtcttgactgcaggtcgactctagaGGATCC	Partial sequence of KpARG4 gene	283
*SacII/BamHI sites are indicated in bold and capitalized
